# Supplementary material for: Phosphate-solubilizing Bacteria from Safflower Rhizosphere and their Effect on Seedling Growth
Source: PubMed Central journal article supplement (PMC7874793; doi:10.1515/biol-2019-0028), 2019-07-10
Supplement: biol-14-246_sm.pdf [file biol-14-246_sm.pdf]

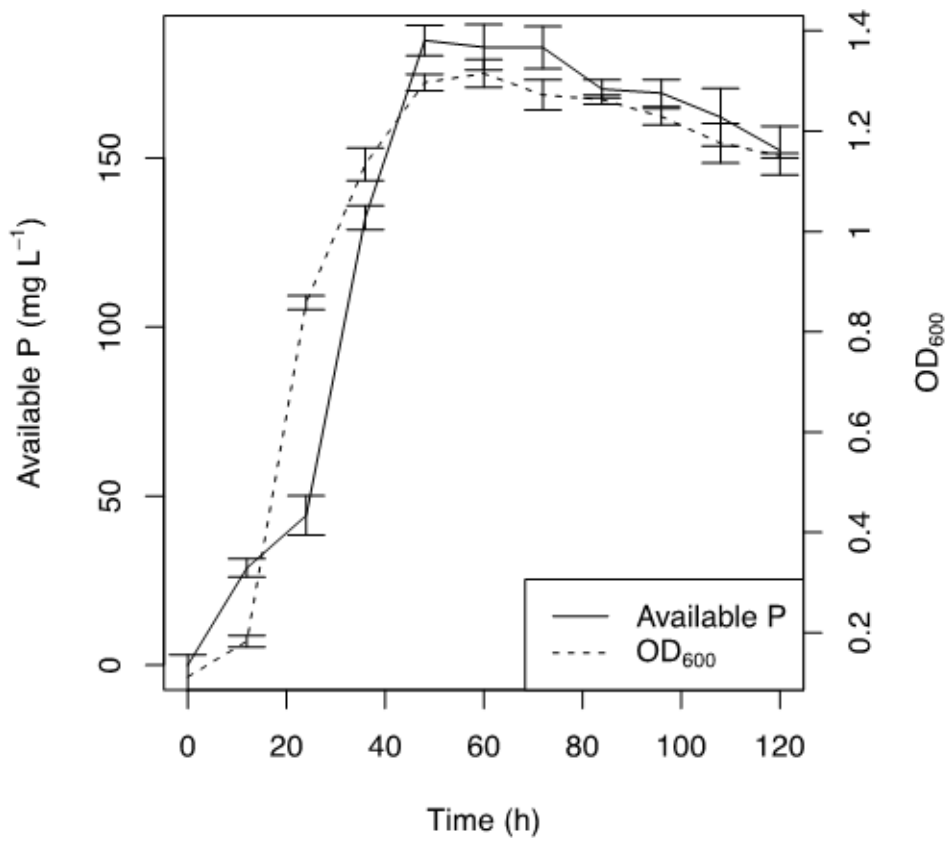

**Supplementary figure.** Growth profile of *Acinetobacter* sp. RC04 and culture phosphate solubility. Error bars show standard errors ( $n = 5$ ).  $OD_{600}$  was correlated with P solubilization (Spearman's rank correlation  $\rho = 0.95$ ,  $P < 10^{-16}$ ).
